# Supplementary material
Source: publisher figshare collection journal article supplement (https://gsapubs.figshare.com/articles/dataset/_/21918930)
Supplement: Supplementary file 2 [file 3]

## Sheet: Sheet2
TABLE S3: PARAMETERS USED IN SUBSIDENCE ANALYSIS INCLUDING PALEOBATHYMETRY ESTIMATES
Section and Formation (Fm.)/member (Mbr.) name	Unit thickness, y (m)	Age of unit top (Ma)	Age of unit base (Ma)	Estimated maximum paleobathymetry of deposition (m)									Lithology (%)			Average grain density, ρsg (kg m-3)	Average initial porosity, Φ0 (%)	Porosity decay constant c (km-1)
				Low-end estimates			Moderate estimates			High-end estimates
				Linear interpolation	Exponential regression	Logarithmic regression	Linear interpolation	Exponential regression	Logarithmic regression	Linear interpolation	Exponential regression	Logarithmic regression	Limestone & Carbonate Mudstone	Quartzose Sandstone & Siltstone	Calcarenite & Calcirudite
Darwin Hills
Darwin Canyon Fm.	1600	283.5	287.856	1000	1000	1000	2000	2000	2000	3000	3000	3000	0.3587	0.5596	0.0818	2754.65	49.1212	0.478454
Unconformity	0	287.856	291.81	895.89	868.6	888.72	1735.71	1505.81	1705.91	2575.53	2116	2523.1	N.A.*	N.A.*	N.A.*	N.A.*	N.A.*	N.A.*
Darwin Hills Mbr. 6	502	291.81	295.295	801.56	723.56	799.06	1496.27	1164.51	1504.65	2190.98	1567.15	2210.24	0.1388	0.7781	0.0831	2714.96	52.6158	0.432444
Darwin Hills Mbr. 5	100	295.295	297.071	718.22	615.7	720.85	1284.72	927.93	1329.08	1851.21	1201.96	1937.31	0.125	0.5673	0.3077	2739.42	49.6922	0.465482
Darwin Hills Mbr. 4	70	297.071	299.7	675.96	567.3	681.53	1177.42	826.97	1240.83	1678.89	1050.65	1800.12	0	0	1	2800	42	0.55
Darwin Hills Mbr. 3	55	299.7	301.3	613.15	502.32	623.55	1018	696.9	1110.66	1422.85	860.26	1597.78	0.2917	0.4583	0.25	2762.51	47.8328	0.491257
Darwin Hills Mbr. 2	50	301.3	303.7	574.94	466.49	588.52	921.01	627.99	1032.03	1267.08	761.74	1475.55	0	0	1	2800	42	0.55
Unconformity	0	303.7	310.719	517.63	417.48	536.32	775.53	537.19	914.87	1033.43	634.71	1293.42	N.A.*	N.A.*	N.A.*	N.A.*	N.A.*	N.A.*
Tihvipah Limestone	120.7	310.719	323.2	350	350	350	350	350	350	350	350	350	0.9827	0	0.0173	2858.96	40.0346	0.599135
Northern Argus Range
Darwin Canyon Fm.	1600	283.5	287.856	1000	1000	1000	2000	2000	2000	3000	3000	3000	0.3587	0.5596	0.0818	2754.65	49.1212	0.478454
Osborne Canyon Fm.	345.9	287.856	291.81	895.89	868.6	888.72	1735.71	1505.81	1705.91	2575.52	2116	2523.1	0.7747	0	0.2253	2846.48	40.4506	0.588735
Unconformity	0	291.81	310.719	801.56	723.56	799.06	1496.27	1164.51	1504.65	2190.98	1567.15	2210.24	N.A.*	N.A.*	N.A.*	N.A.*	N.A.*	N.A.*
Tihvipah Limestone	120.7	310.719	323.2	350	350	350	350	350	350	350	350	350	0.9827	0	0.0173	2858.96	40.0346	0.599135
Marble Canyon
Darwin Canyon Fm.	399.3	285.3	287.856	1000	1000	1000	2000	2000	2000	3000	3000	3000	0.1379	0.8392	0.0229	2707.57	53.473	0.422623
Osborne Canyon Fm.	148.9	287.856	291.81	898.94	686.72	847.79	1780.05	1221.31	1657.65	2661.16	1683.41	2467.52	0.8443	0.0329	0.1228	2846.71	40.772	0.586951
Unconformity	0	291.81	305.35	676.73	549.67	731.99	1296.41	901.45	1418.61	1916.09	1184.72	2105.24	N.A.*	N.A.*	N.A.*	N.A.*	N.A.*	N.A.*
Bird Spring Fm.	601.3	305.35	320.48	150	150	150	150	150	150	150	150	150	0.9258	0	0.0742	2855.55	40.1484	0.59629
*N.A. = not applicable
