# Supplementary material
Source: publisher figshare collection journal article supplement (https://gsapubs.figshare.com/articles/dataset/_/21918930)
Supplement: Supplementary file 2 [file 3]

Vaughn, L.W., Leary, R.J., and Read, M.T., 2022, Tectonic and stratigraphic evolution of the late Paleozoic Darwin Basin, eastern California, USA, and implications for the onset of subduction along the southwestern Cordilleran margin of Laurentia: GSA Bulletin, <https://doi.org/10.1130/B36664.1>.

## Supplemental Material

**Text.** Field Methods, Detailed Methods for Conodont Biostratigraphy, Clast Counting Methods, and Detailed Methods for Tectonic Subsidence Analysis.

**Figure S1.** Measured sections 1.2 and 1.3 at the mouth of Osborne Canyon (Lower Osborne Canyon). Section 1.2 traverses the uppermost part of the Tihvipah Limestone (IPt) and the Osborne Canyon Formation (Po). Section 1.3 traverses an incomplete faulted section of the Osborne Canyon Formation. Both sections terminate at faults. See Figure 4.1 for traverse locations and Fig. 5 for legend.

**Figure S2.** Measured sections 2.1 and 2.2 in the southernmost Darwin Hills. Section 2.1 traverses the Mississippian Indian Springs Formation (Mi), Pennsylvanian Tihvipah Limestone (IPt), and unit 1 of the Darwin Hills sequence (IPdh1). The former two are separated from the latter by an angular unconformity. Section 2.2 traverses the Mississippian Indian Springs Formation (Mi), Pennsylvanian Tihvipah Limestone (IPt), and units 3-6 of the Darwin Hills sequence (IPdh3-PIPdh6). Both sections terminate at Quaternary Alluvium. See Figure 4.5 for traverses and Fig. 5 for legend. See Table S2 for clast count data.

**Figure S3.** Measured sections 5.1, 5.2, 5.3, and 5.4 in the Santa Rosa Hills. Sections traverse the uppermost part of the Tihvipah Limestone (IPt), and the exposed portion of the unnamed turbidite unit (PIPut). Sections end where Quaternary alluvium obscures further section. See Figure 4.5 for traverses and Fig. 5 for legend. See Table S2 for clast count data.

**Figure S4.** 30 hypothetical subsidence curves for the Darwin Basin. The curves plotted in black and white are presented in the main paper. Plotted in blue, green, and red are the calculated subsidence curves assuming low, moderate, and high, respectively, paleobathymetry estimates. Shaded in gray is the possible range of subsidence curves for the Darwin Basin. Regardless of the absolute magnitude of paleobathymetry (except for perhaps the high-end estimates), or how paleobathymetric increase varies over time (i.e., linear, logarithmic, exponential), all 30 curves have similar concave down geometry and display initially gradual subsidence before an abrupt transition to rapid subsidence. Based on this, we are confident about drawing conclusions about the evolution of the Darwin Basin based on the geometry of these curves. See Table S3 for values used in constructing these curves.

**Table S1.** Sample list.

**Table S2.** Clast counts.

**Table S3.** Parameters used in subsidence analysis including paleobathymetry estimates.

1 Tectonic and stratigraphic evolution of the late Paleozoic  
2 Darwin Basin, eastern California, USA, and implications  
3 for the onset of subduction along the southwestern  
4 Cordilleran margin of Laurentia – Supplemental Data File

5  
6 **L. W. Vaughn<sup>1</sup>, Ryan J. Leary<sup>1</sup>, Michael T. Read<sup>2</sup>**

7 *<sup>1</sup>Department of Earth and Environmental Science, New Mexico Institute of Mining and  
8 Technology, 801 Leroy Pl, Socorro, NM 87801, USA*

9 *<sup>2</sup>Department of Geology, Stephen F. Austin State University, 2102 Alumni Dr,  
10 Nacogdoches, TX 75962, USA*

11 **FIELD METHODS**

12 During this study, we measured 15 sections, but only presented the most important  
13 sections in the main manuscript. The remainder are included in this supplemental data  
14 file (**Fig. S1, S2, and S3**).

15 **DETAILED METHODS FOR CONODONT BIOSTRATIGRAPHY**

16 Conodont elements were picked following chemical digestion of carbonate samples and  
17 density separation of the resultant insoluble residues. Prior to chemical processing, bulk  
18 samples were broken into small pieces (between two and six centimeters in diameter),  
19 rinsed thoroughly to remove any coating of carbonate dust, and digested using a  
20 buffered 8-10% formic acid solution. The formic acid solution was changed every 1.5

days and the digestion process was repeated until nearly all acid-soluble material was dissolved. The remaining insoluble residues were sieved between 16 and 120 meshes and collected with each changing of the buffered acid solution. Care must be taken when sieving insoluble residues to avoid damaging any conodont elements present. Complete digestion of a three to five-kilogram carbonate or mixed carbonate-siliciclastic sample typically requires seven to ten days of continuous chemical processing.

Insoluble residues were dried in an oven at low temperature (50° C) to avoid thermal alteration of low-CAI (conodont color alteration index) specimens. The heavy mineral fraction of the insoluble residue was then density separated from quartz grains and other “light” insolubles using separation funnels and a solution of tetrabromoethane and acetone measured to a density of 2.81 to 2.83 g/ml. Separation funnels were covered and stirred twice daily for two to three days. Once captured, the heavy fraction was rinsed with acetone and left to dry for several days. Samples remained under a fume hood until they were completely odorless. See **Table S1** for sample locations and information.

## **CLAST COUNTING METHODS**

We counted between 84 to 210 clasts in 15 beds of calcirudite in the Darwin Basin. The number of clasts counted varied based on the grain size and exposure of the bed. Counting was done by choosing an initial starting clast, and then counting adjacent clasts in an outward spiral from the first clast. See **Table S2** for clast count data.

## **DETAILED METHODS FOR TECTONIC SUBSIDENCE ANALYSIS**

One-dimensional subsidence analysis is a quantitative technique that reconstructs the vertical displacement of a point on an initially horizontal datum through time, based on information extracted from the stratigraphic column overlying this horizontal datum (Steckler and Watts, 1978; van Hinte, 1978; Sclater and Christie, 1980; Bond and Kominz, 1984; Dickinson et al., 1987; Angevine et al., 1990; Roberts et al., 1998; Xie and Heller, 2009; Allen and Allen, 2013; Sturmer et al., 2018; Lee et al., 2018). Computing the vertical displacement (i.e., subsidence and/or uplift) of such a point at any time in the past,  $t$ , is a multi-step process that requires information about the thickness, lithology, and age of the stratigraphy overlying the datum, the paleo-bathymetry or paleo-elevation at which deposition of these sediments occurred, and eustatic variation in sea level between  $t$  and the present day. The process of calculating vertical displacement at any time,  $t$ , begins by restoring the thickness of the stratigraphic column overlying the point to its thickness at  $t$  by undoing post- $t$  diagenetic processes that resulted in thickness changes such as compaction or pressure solution (e.g. Sclater and Christie, 1980). The decompaction equation (Allen and Allen, 2013) must be solved iteratively for each unit in the overlying stratigraphy:

$$y'_2 - y'_1 = y_2 - y_1 - \frac{\phi_0}{c} [e^{-cy_1} - e^{-cy_2}] + \frac{\phi_0}{c} [e^{-cy'_1} - e^{-cy'_2}] \quad (\text{S1})$$

Where  $y_2$  and  $y_1$  are the present day burial depths of the base and top of the unit being decompacted,  $\phi_0$  is the initial porosity of the sediment that makes up the unit at the moment of deposition, typically obtained by comparison with modern sediments (Table 2),  $c$  is an empirically derived porosity decay constant (Table 2) and  $y'_2$  and  $y'_1$  are the burial depths of the base and top of the unit in question after removing overlying strata

and decompacting the unit by this process. Next the porosity  $\Phi$  of each restored sedimentary layer must be calculated following Athy, (1930) and Allen and Allen, (2013):

$$\Phi = \frac{\Phi_0}{c} * \frac{e^{-cy'_1} - e^{-cy'_2}}{y'_2 - y'_1} \quad (S2)$$

A component of subsidence undergone by the point in question will be caused by localized flexural loading due to the weight of the stratigraphic column on the lithosphere at the point; but this component can be calculated and removed via a simple isostatic balancing process called backstripping (e.g. Steckler and Watts, 1978; Allen and Allen, 2013), which first requires the calculation of the density of the sedimentary column using the restored thickness calculated in **Equation S1** and the porosity calculated by **Equation S2**:

$$\bar{\rho}_s = \sum_i \left\{ \frac{\bar{\Phi}_i(\rho_w) + (1 - \bar{\Phi}_i)\rho_{sg_i}}{S} \right\} y'_i \quad (S3)$$

From Steckler and Watts, (1978) where  $\bar{\Phi}_i$  is the porosity of the *i*th layer,  $\rho_w$  is the density of water (1025 kg/m<sup>3</sup> for sea water, Lee et al., 2019),  $\rho_{sg_i}$  is the density of the individual framework grains that make up the *i*th sedimentary layer (**Table 2**),  $y'_i$  is the restored thickness of the *i*th sedimentary layer, and  $S$  is the restored thickness of the entire sedimentary column. Once the density of the sedimentary column is known, the backstripped tectonic subsidence (i.e. subsidence caused solely by tectonic processes such as flexural loading of the lithosphere in an orogenic belt or isostatic adjustment

following thinning of the lithosphere in a rift, e.g. Steckler and Watts, 1978; Xie and Heller, 2009; Allen and Allen, 2013) is given by:

$$Z(t) = S(t) \left( \frac{\rho_m - \rho_s}{\rho_m - \rho_w} \right) + W_d(t) \pm \Delta_{SL}(t) \left( \frac{\rho_m}{\rho_m - \rho_w} \right) \quad (\text{S4})$$

From Steckler and Watts, (1978), where  $Z(t)$  is the tectonic subsidence at any time  $t$ ,  $S(t)$  is the decompacted sediment layer thickness at  $t$ ,  $\rho_m$  is the density of the mantle (3300 kg/m<sup>3</sup>, Lee et al., 2019),  $W_d(t)$  is the paleo-bathymetry or paleo-elevation of deposition at  $t$  (**Table 2**), and  $\Delta_{SL}$  is the difference between eustatic sea level at  $t$  and mean sea level at the present time. Computation of  $Z(t)$  at a series of times yields a tectonic subsidence curve which illustrates the component of subsidence of the point caused purely by tectonic forces. The geometry, slope, duration, and concavity (and abrupt changes in these features) of the resulting curve can be used to speculate on the timing and mechanism by which tectonic subsidence occurred (Bond and Kominz, 1984; Bond et al., 1985; Xie and Heller, 2009; Allen and Allen, 2013; Lee et al., 2018).

At the time of this study, we have sufficient data to produce one-dimensional, Airy-type tectonic subsidence curves (e.g., Steckler and Watts, 1978; van Hinte, 1978; Sclater and Christie, 1980; Bond and Kominz, 1984; Dickinson et al., 1987; Hegarty et al., 1988; Angevine et al., 1990; Roberts et al., 1998; Xie and Heller, 2009; Allen and Allen, 2013; Sturmer et al., 2018) for three locations within the Darwin Basin. The duration of our curves includes both the Darwin Basin and pre-Darwin Basin Pennsylvanian shelf. Polyphase deformation of Darwin Basin strata and limited along-strike and along-dip exposure of the basin preclude the construction of more advanced subsidence models

(e.g., Roberts et al., 1998). Iterative decompaction and backstripping (e.g., Steckler and Watts, 1978; Sclater and Christie, 1980) calculations were completed using the program Backstrip (Nestor Cardozo, <http://www.ux.uis.no/~nestor/work/programs.html>). Stratigraphic thicknesses were compiled from Stone et al. (1987; 2014); Stevens et al. (2015c) and this study (**Table 2**). Age control was introduced by comparing biostratigraphic data in Stone et al. (2014); Stevens et al. (2015a; 2015c), and our new data from this study with the timescales of Aretz et al., (2020) and Henderson et al., (2020) (**Fig. 3 and Table 2**). Informed by our petrographic examination of Darwin Basin strata, we picked reasonable grain density values, exponential porosity decay constants, and initial porosity values for rocks of the Darwin Basin from those reported for similar lithofacies described by Sclater and Christie (1980, and references therein) and Hegarty et al. (1988) (**Table 2**). When choosing values for these terms we assumed that all porosity loss in the Darwin Basin occurred via compaction and/or pressure solution, that abnormally early cementation did not occur (e.g., Bond and Kominz, 1984), and that Darwin Basin strata were normally pressured during burial. Pressure solution features at both the outcrop and thin section scale are ubiquitous within the Darwin Basin. Following the approach of Xie and Heller, (2009) we chose to ignore eustatic sea level variation in construction of our curves because these variations are poorly constrained, especially during the late Paleozoic (e.g., Ross and Ross, 1987; Dyer and Maloof, 2015), but more importantly because the plausible range in magnitude of this variation in sea level, perhaps 200 meters across the entire late Paleozoic, is an order of magnitude smaller than the thickness of sediment deposited within the Darwin Basin (**Table 2**). In other words, over ten Myr a few tens of meters of eustatic sea level

variation is insignificant in comparison to the deposition of few thousand meters of sediment and hundreds of meters of paleobathymetric variation.

The foremost obstacle to one-dimensional tectonic subsidence analysis lies in the accurate estimation of the paleo-bathymetry or paleo-elevation at which deposition occurred (e.g., Dickinson et al., 1987; Roberts et al., 1998; Xie and Heller, 2009). Errors resulting from inaccurate paleo-bathymetry or elevation estimates are small in shallow marine or terrestrial basins but can be significant in deep-marine settings such as the Darwin Basin (Dickinson et al., 1987; Xie and Heller, 2009). Reasonable paleo-bathymetry estimates of deep-water strata based on facies analysis (e.g., Angevine et al., 1990) can vary by over an order of magnitude. For example, in the modern oceans, essentially identical deep water carbonate depositional systems can exist anywhere from a few hundred meters to several kilometers water depth (Payros and Pujalte, 2008; Reijmer et al., 2015; Mulder et al., 2017; Tournadour et al., 2017). This problem is compounded by the fact that no *in situ* fossils that could be used to estimate paleo-bathymetry are present in Darwin Basin strata. For these reasons we have devised two methods for constraining paleobathymetry in our model. For one approach we have assumed no change in paleobathymetry during deposition of Darwin Basin and older Pennsylvanian shelf strata. Although this assumption is almost certainly violated based on lithofacies analysis of Darwin Basin strata, we argue that this is the most conservative and justifiable approach to constraining paleo-bathymetry in the Darwin Basin. This approach precludes overestimation of tectonic subsidence, prevents the presentation of artificial subsidence or uplift caused by inaccurate paleo-bathymetry picks, and provides a firm, minimum bound on variation in our subsidence curves. In



other words, the true magnitude and rate of subsidence within the Darwin Basin must necessarily be equal to, or greater than, the subsidence illustrated by our model. We have thus used this approach for the subsidence curves presented in the main body of this paper.

The second approach strengthens the conclusions we draw in the main paper regarding the geometry of our subsidence curves. We argue that a simple mathematical assumption based on lithofacies analysis limits variation in the geometry of our curves to vertical uncertainty alone. We illustrate this below to support our conclusions in the main paper. Let  $W_{db}$  equal the paleobathymetry, in meters, at which the Bird Spring Formation was deposited,  $W_{dt}$  equal the paleobathymetry at which the Tihvipah Limestone was deposited,  $W_{do}$  equal the paleobathymetry at which the Osborne Canyon Formation was deposited, and  $W_{dd}$  equal the paleobathymetry at which the Darwin Canyon Formation was deposited. Based on lithofacies analysis, it is clear that the deep-marine facies of the Darwin Canyon and Osborne Canyon formations were deposited in deeper water than slope facies of the Tihvipah Limestone, that in turn were deposited in deeper water than shelf facies of the Bird Spring Formation. Despite our inability to quantify the exact paleo-bathymetry at which deposition occurred, we can express this mathematically as:

$$W_{db} < W_{dt} < W_{do} < W_{dd} \quad (1)$$

Xie and Heller (2009) proposed an average paleo-bathymetry of 150 meters for shelf environments and 350 meters for upper slope depositional environments; in absence of other constraints for the paleobathymetry of these units, we can assume a similar paleo-

bathymetry of deposition for the shelf and slope facies of the Bird Spring Formation and Tihvipah Limestone. Next, based on the large amount of calciclastic detritus in all units of the Darwin Basin, we can place a lower bound on **Equation 1** by assuming that deposition of the Darwin Canyon and Osborne Canyon formations occurred above the carbonate compensation depth. The depth of the carbonate compensation depth in the late Paleozoic is unknown, but over Cenozoic times the carbonate compensation depth has varied between 3 and 4.6 kilometers in the equatorial Pacific Ocean (Pälike et al., 2012). Because the Darwin Basin formed at equatorial latitudes on the eastern margin of the Panthalassan Ocean, we can adopt a conservative estimate of 3 kilometers for the CCD. The adoption of the CCD as the lower bound on our equation is somewhat arbitrary, as nearly any reasonable paleobathymetry value produces similar results when applied as the lower bound (**Fig. S4**) Applying these bounds to **Equation 1** results in:

$$150 < 350 < W_{do} < W_{dd} < 3000 \quad (2)$$

We envisioned three possible scenarios to describe how paleobathymetry in the Darwin Basin increased over time between the lower and upper bounds of **Equation 2**. 1. Paleobathymetry increased at a constant rate. 2. The rate at which paleobathymetry increased, increased with time. 3. The rate at which paleobathymetry increased, decreased with time. We applied linear interpolation (scenario 1), exponential regression (scenario 2), and logarithmic regression (scenario 3) to **Equation 2** and thus calculated hypothetical paleobathymetry of deposition values (see **Table S3**) for deep-marine strata of the Darwin Basin ( $W_{do}$ ,  $W_{dd}$ ). For each method, we further envisioned a

high-end (3 km, conservative estimate of CCD), moderate (2 km, arbitrary, for illustrative purposes only), and low-end estimate (1 km, arbitrary, for illustrative purposes only) of paleobathymetry of deposition for the Darwin Canyon Formation. These estimates, including the CCD, are somewhat arbitrary but fall within realistic bathymetry ranges for modern deep-marine carbonate depositional systems. However, these paleobathymetric estimates are not intended to be and should not be considered as the actual depth at which the Darwin Canyon Formation was deposited. They are convenient lower bounds to our interpolation/regression and serve only to illustrate our assumptions, and support the conclusions presented in the main paper.

Producing subsidence curves using the moderate and low-end estimated paleobathymetry values results in subsidence curves (Blue and Green in **Fig. S4**) with similar geometry and concavity compared to the curves we present in this paper, but progressively steeper slopes as increasing values of paleobathymetry are used. The high-end estimate paleobathymetry curves (red in **Fig. S4**) are less similar, as the geometry and concavity of these curves are drowned out by exceptionally high subsidence rates. However, based on the constant overall geometry (concave down, initially gradual subsidence followed by an abrupt transition to rapid subsidence) of all the other curves, we are confident in drawing conclusions about the tectonic origin and history of the Darwin Basin based on the geometry of these curves (detailed in main paper). Finally, we argue that the true subsidence curve of the Darwin Basin must lie between the deepest high-end estimate and the shallowest low-end estimate (somewhere in the gray shaded field in **Fig. S4**), and its overall geometry must mimic

the other illustrated curves, (i.e. concave down, initial gradual subsidence, and later rapid subsidence).

## SUPPLEMENTAL FIGURE CAPTIONS

**Figure S1:** Measured sections 1.2 and 1.3 at the mouth of Osborne Canyon (Lower Osborne Canyon). Sections 1.2 traverses the uppermost part of the Tihvipah Limestone (IPt) and the Osborne Canyon Formation (Po). Section 1.3 traverses an incomplete faulted section of the Osborne Canyon Formation. Both sections terminate at faults. See **Figure 4.1** for traverse locations and **Fig. 5** for legend. C—clay; vF—very fine sand; M—medium sand; vC—very coarse sand; P—pebble; B—Boulder.

**Figure S2:** Measured sections 2.1 and 2.2 in the southernmost Darwin Hills. Section 2.1 traverses the Mississippian Indian Springs Formation (Mi), Pennsylvanian Tihvipah Limestone (IPt), and unit 1 of the Darwin Hills sequence (IPdh1). The former two are separated from the latter by an angular unconformity. Section 2.2 traverses the Mississippian Indian Springs Formation (Mi), Pennsylvanian Tihvipah Limestone (IPt), and units 3-6 of the Darwin Hills sequence (IPdh3-PIPdh6). Both sections terminate at Quaternary Alluvium. See **Figure 4.5** for traverses and **Fig. 5** for legend. See **Table S2** for clast count data. C—clay; vF—very fine sand; M—medium sand; vC—very coarse sand; P—pebble; B—Boulder.

**Figure S3:** Measured sections 5.1, 5.2, 5.3, and 5.4 in the Santa Rosa Hills. Sections traverse the uppermost part of the Tihvipah Limestone (IPt), and the exposed portion of the unnamed turbidite unit (PIPut). Sections end where Quaternary alluvium obscures

further section. See **Figure 4.5** for traverses and **Fig. 5** for legend. See **Table S2** for clast count data. C—clay; vF—very fine sand; M—medium sand; vC—very coarse sand; P—pebble; B—Boulder.

**Figure S4:** 30 hypothetical subsidence curves for the Darwin Basin. The curves plotted in black and white are presented in the main paper. Plotted in blue, green, and red are the calculated subsidence curves assuming low, moderate, and high, respectively, paleobathymetry estimates. Shaded in gray is the possible range of subsidence curves for the Darwin Basin. Regardless of the absolute magnitude of paleobathymetry (except for perhaps the high-end estimates), or how paleobathymetric increase varies over time (i.e., linear, logarithmic, exponential), all 30 curves have similar concave down geometry and display initially gradual subsidence before an abrupt transition to rapid subsidence. Based on this, we are confident about drawing conclusions about the evolution of the Darwin Basin based on the geometry of these curves. See **Table S3** for values used in constructing these curves.

## SUPPLEMENTAL REFERENCES

Athy, L.F., 1930, Density, Porosity, and Compaction of Sedimentary Rocks: AAPG Bulletin, v. 14, p. 1-24.

Pälike, H., and 64 others, 2012, A Cenozoic record of the equatorial Pacific carbonate compensation depth: Nature, v. 488, p. 609–614, doi:10.1038/nature11360.

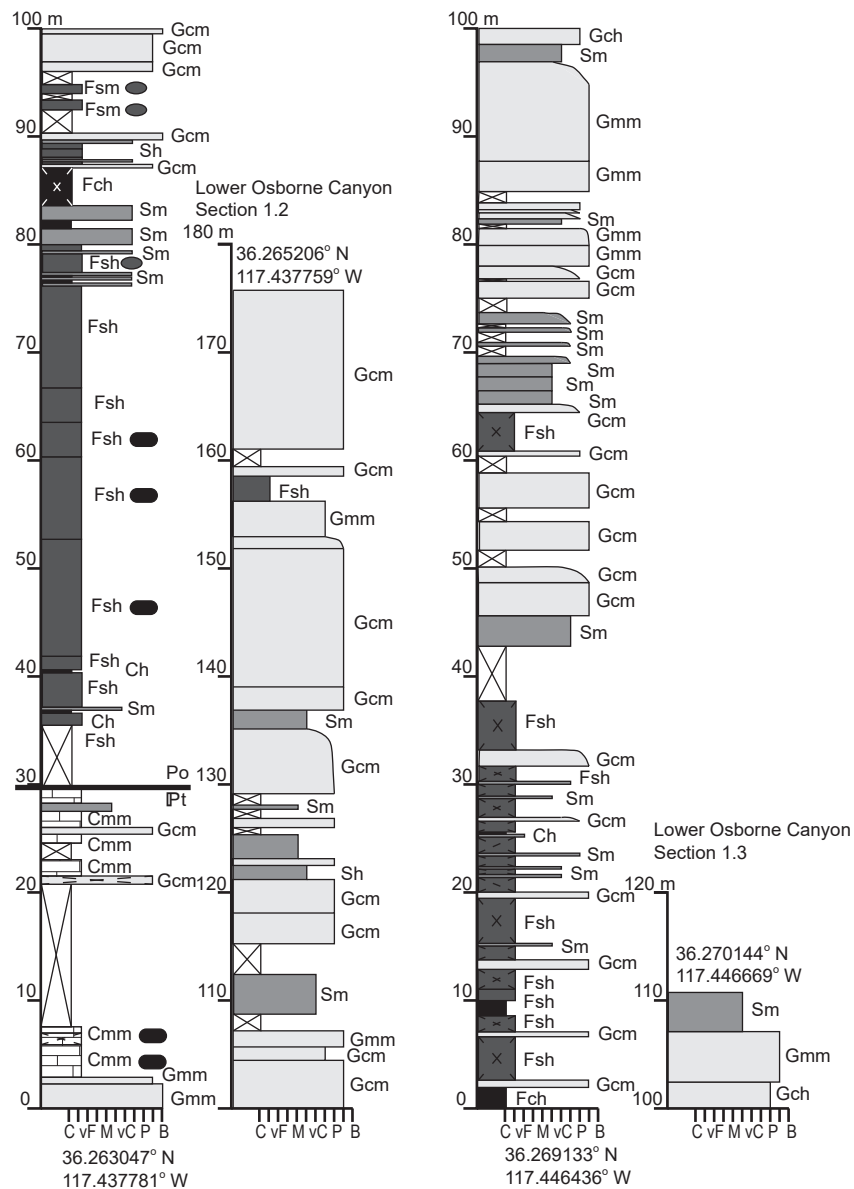

Vaughn et al. Figure S1

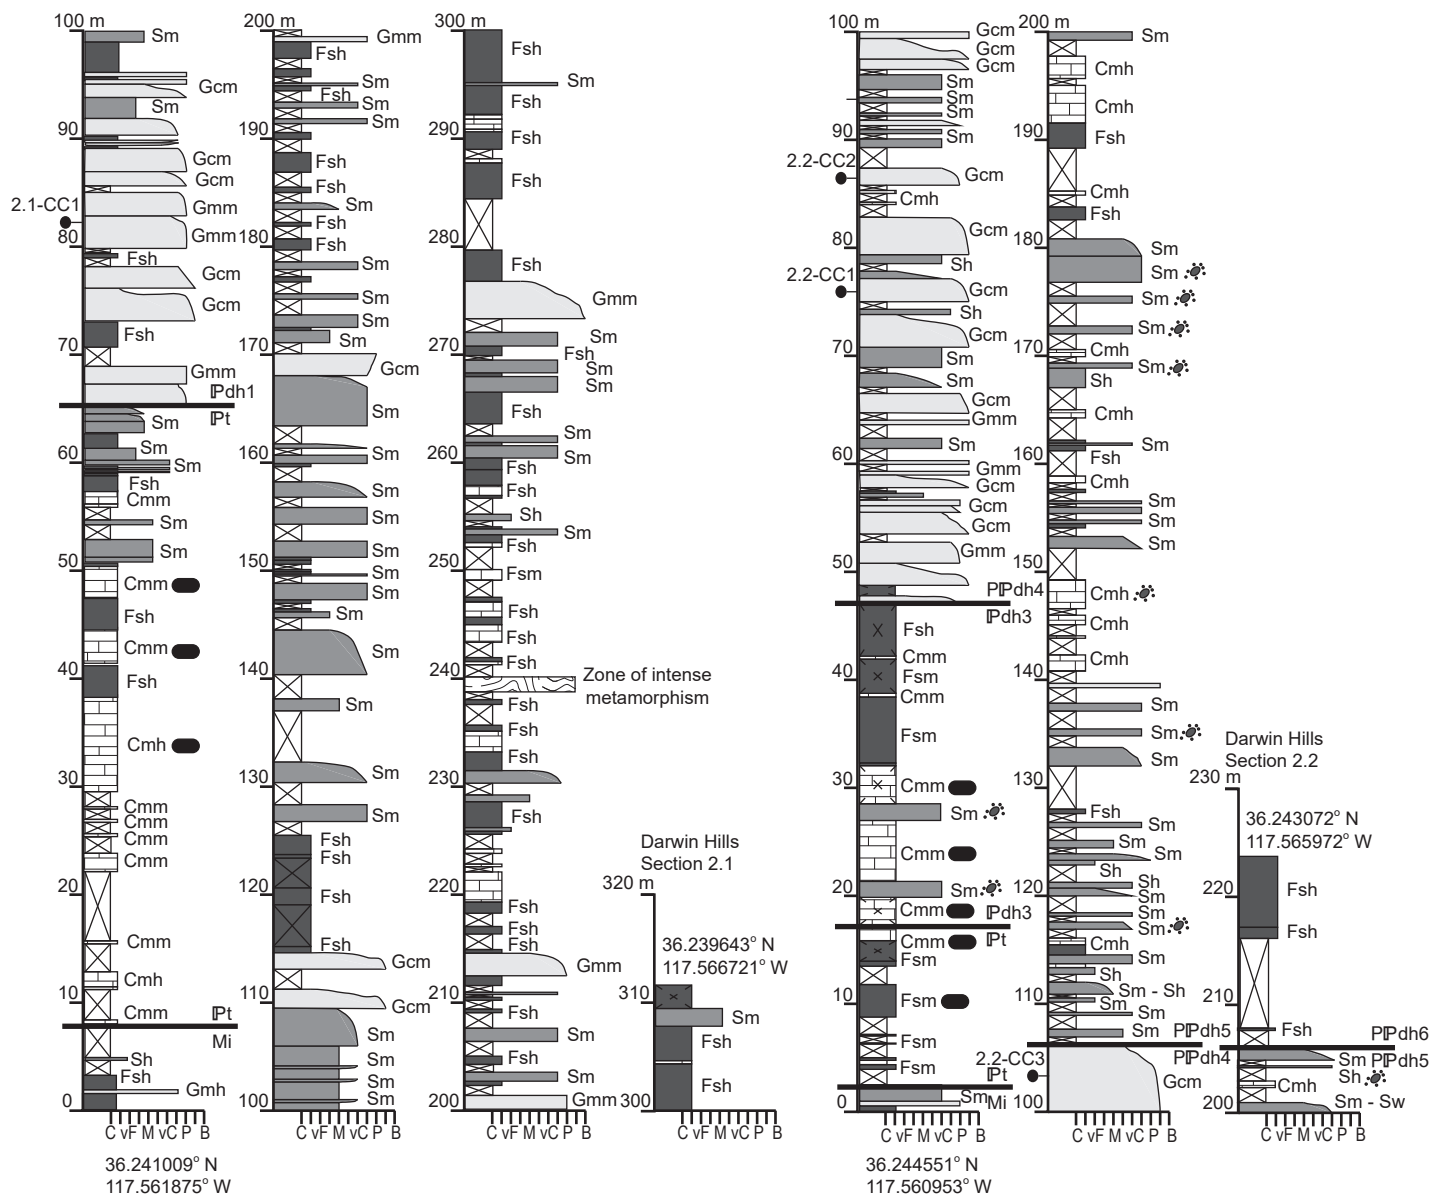

Vaughn et al. Figure S2

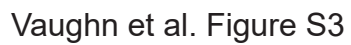



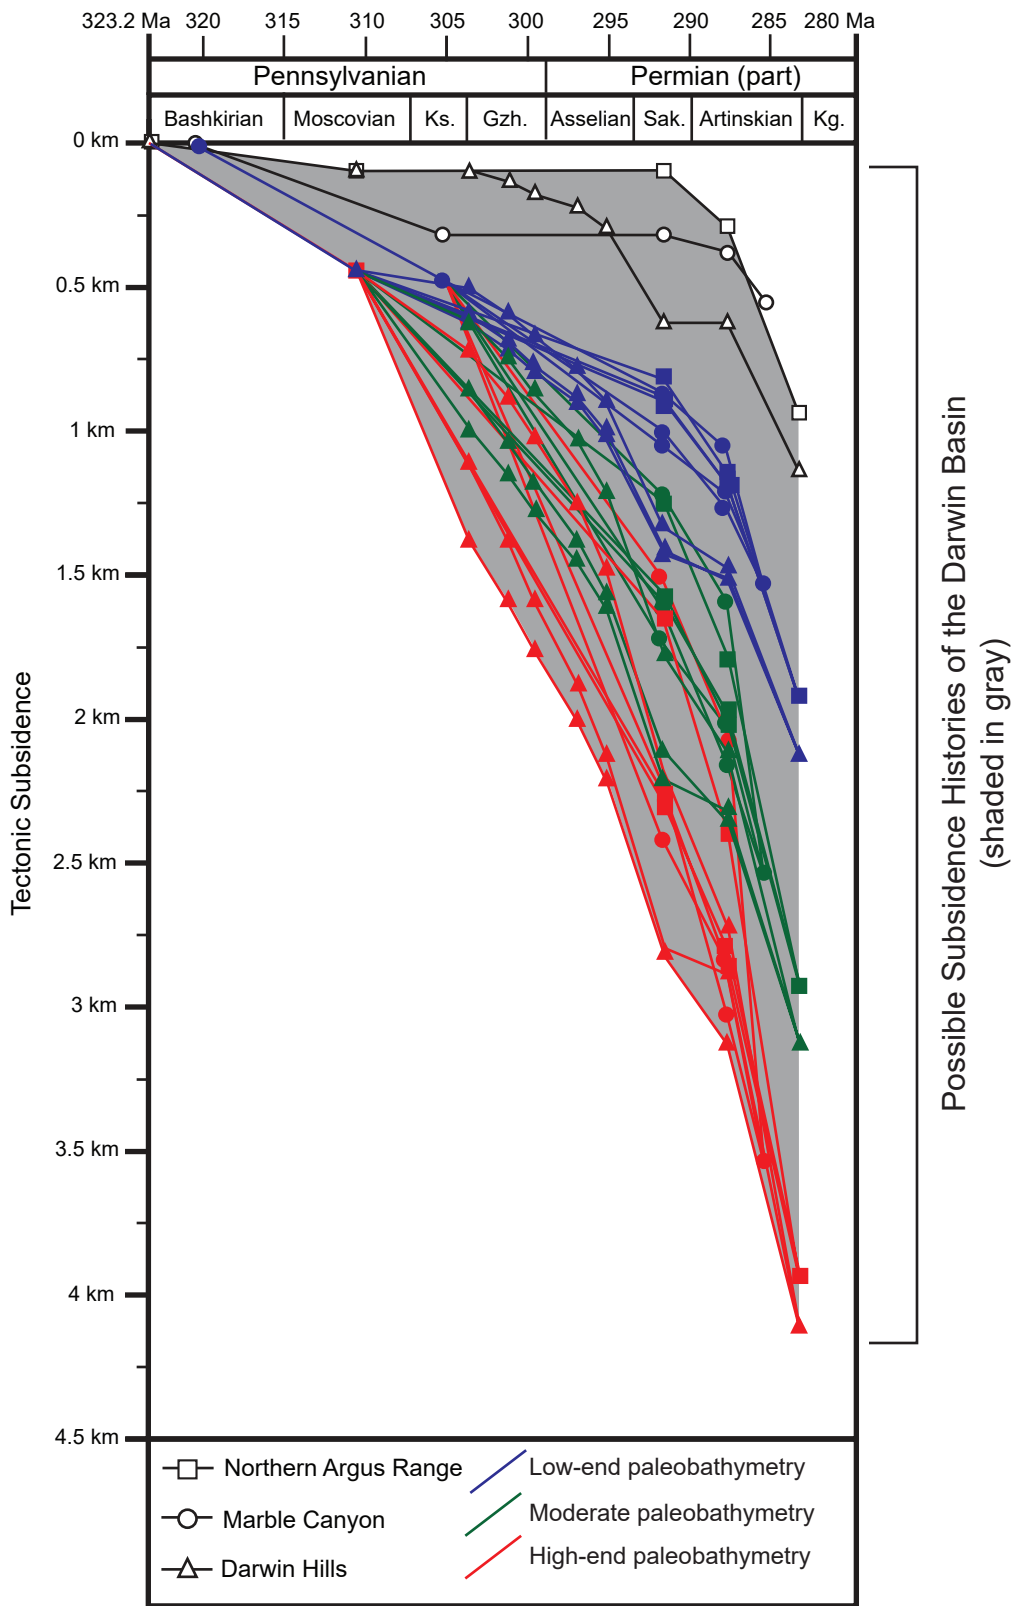

Vaughn et al. Figure S4
